# Supplementary material for: Impact of fetal maceration grade on risk of maternal disseminated intravascular coagulation after intrauterine fetal death – A retrospective cohort study
Source: PubMed Central journal article supplement (PMC6109103; doi:10.1038/s41598-018-30687-0), 2018-08-24
Supplement: 41598_2018_30687_MOESM1_ESM.pdf [file 41598_2018_30687_MOESM1_ESM.pdf]

**Impact of fetal maceration grade on risk of maternal disseminated intravascular  
coagulation after intrauterine fetal death – A retrospective cohort study**

Dana A. Muin<sup>1,2</sup>, Helmuth Haslacher<sup>3</sup>, Vanessa Koller<sup>1</sup>, Herbert Kiss<sup>1\*</sup>, Anke Scharrer<sup>4</sup>, Alex  
Farr<sup>1</sup>

<sup>1</sup> Department of Obstetrics and Gynecology, Division of Fetomaternal Medicine, Medical  
University of Vienna, 1090, Vienna, Austria

<sup>2</sup> Tommy's Stillbirth Research Center, Faculty of Biology, Medicine and Health, The  
University of Manchester, Manchester, M13 9WL, United Kingdom

<sup>3</sup> Department of Laboratory Medicine, Medical University of Vienna, 1090, Vienna, Austria

<sup>4</sup> Clinical Institute for Pathology, Medical University of Vienna, 1090, Vienna, Austria

**\*Corresponding Author:**

Herbert Kiss, MD, MBA

Medical University of Vienna

Department of Obstetrics and Gynecology, Division of Fetomaternal Medicine

Waehringer Guertel 18–20, 1090 Vienna, Austria

*Tel:* +43 1 40400 28220, *Fax:* +43 1 40400 28620

*Email:* [herbert.kiss@meduniwien.ac.at](mailto:herbert.kiss@meduniwien.ac.at)

**Supplementary Figure 1** Flow diagram on the patients' selection from ViewPoint® database between 2003–2017

**Abbreviations:** DIC Disseminated intravascular coagulation; *n* Number; † Acute postpartum hemorrhage (secondary to uterine atony, trauma or retained tissue), placental abruption, severe pre-eclampsia, HELLP, maternal sepsis, intra-amniotic infection, acute fatty liver, amniotic fluid embolism.

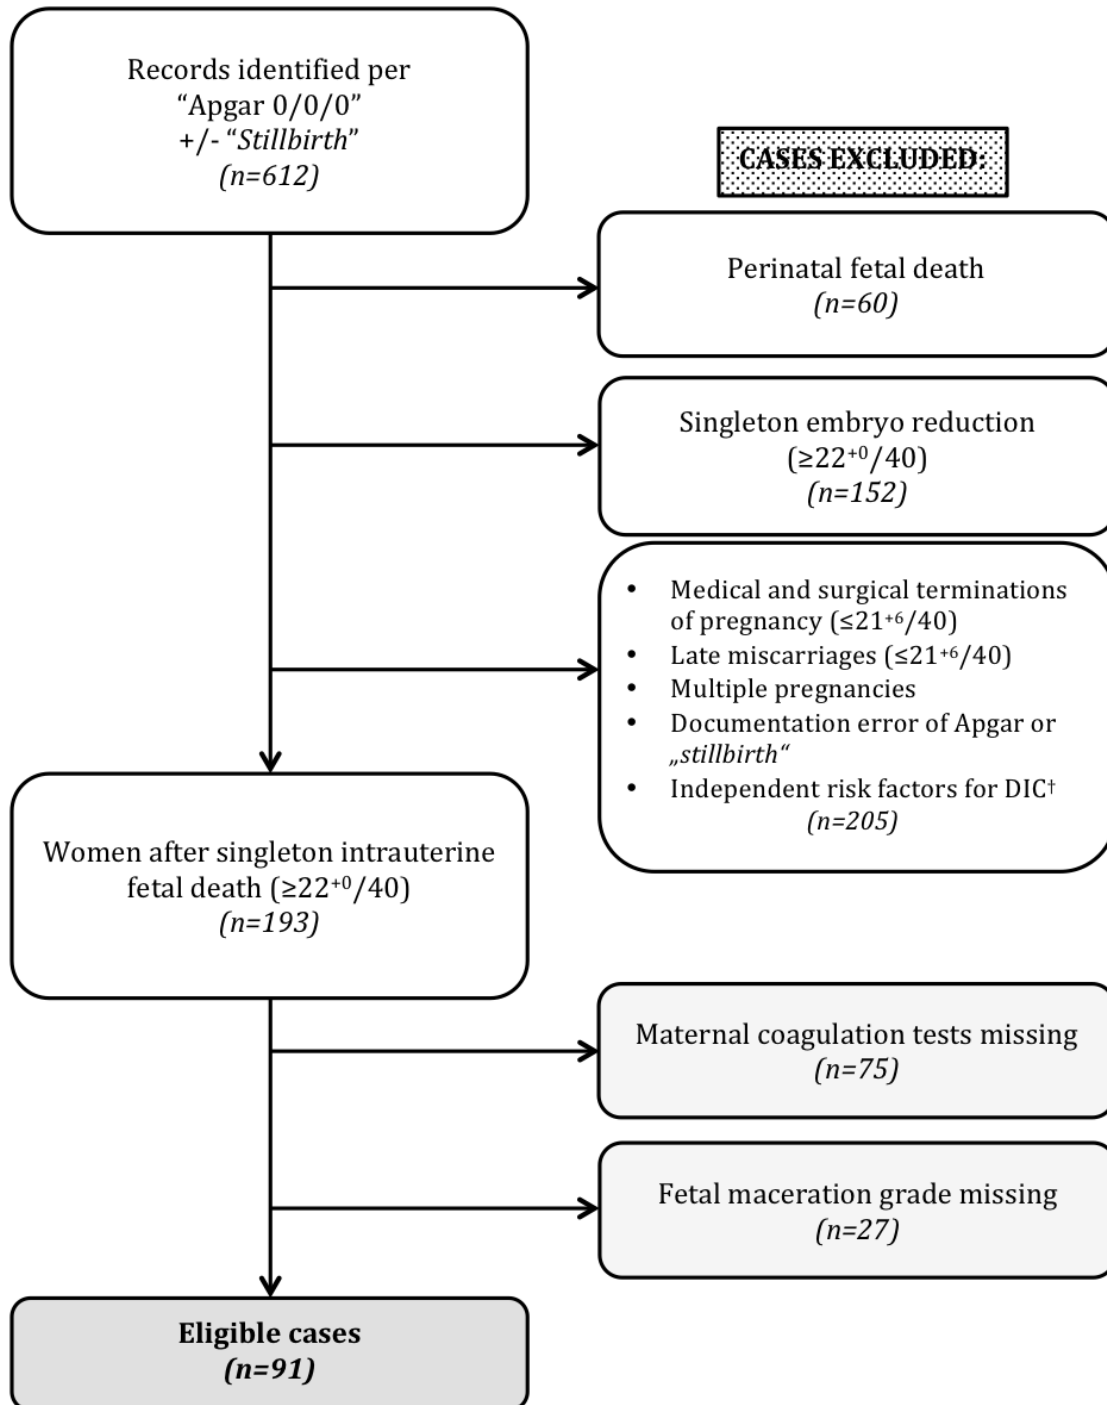

**Supplementary Table 1** Maternal characteristics of women with positive Erez score (n=6)

Abbreviations: *IUFD* Intrauterine fetal death; *IUGR* Intrauterine growth restriction; *LSCS* Lower segment caesarean section; *n/a* not applicable due to missing data

|                              | Patients Nr                                         | 1                                                                                   | 2                                                                         | 3                                           | 4                                                                       | 5                                                           | 6                                                    |
|------------------------------|-----------------------------------------------------|-------------------------------------------------------------------------------------|---------------------------------------------------------------------------|---------------------------------------------|-------------------------------------------------------------------------|-------------------------------------------------------------|------------------------------------------------------|
| Maternal characteristics     | Ethnicity                                           | Middle European, white Caucasian                                                    | Middle European, white Caucasian                                          | Eastern European, white Caucasian           | Middle European, white Caucasian                                        | Middle European, white Caucasian                            | Middle European, white Caucasian                     |
|                              | Maternal age [years]                                | 39                                                                                  | 31                                                                        | 25                                          | 33                                                                      | 35                                                          | 33                                                   |
|                              | BMI [kg/m <sup>2</sup> ]                            | n/a                                                                                 | n/a                                                                       | n/a                                         | n/a                                                                     | 26.35                                                       | 32.95                                                |
|                              | Gravida                                             | 1                                                                                   | 3                                                                         | 1                                           | 1                                                                       | 2                                                           | 2                                                    |
|                              | Para                                                | 0                                                                                   | 0                                                                         | 0                                           | 0                                                                       | 1                                                           | 1                                                    |
|                              | Patient's history                                   | Unremarkable                                                                        | 2x previous miscarriages                                                  | Unremarkable                                | Lupus erythematoses                                                     | 1x previous LSCS                                            | Unremarkable                                         |
|                              | Mode of conception                                  | In-vitro fertilisation                                                              | Spontaneous                                                               | n/a                                         | Spontaneous                                                             | Spontaneous                                                 | Spontaneous                                          |
|                              | Nicotine                                            | no                                                                                  | no                                                                        | n/a                                         | no                                                                      | no                                                          | no                                                   |
|                              | Alcohol                                             | no                                                                                  | no                                                                        | no                                          | no                                                                      | no                                                          | no                                                   |
|                              | Illicit drugs                                       | no                                                                                  | no                                                                        | no                                          | no                                                                      | no                                                          | no                                                   |
|                              | IUFD-Pregnancy characteristics                      | Gestational weeks (at IUFD)                                                         | 25                                                                        | 22                                          | 23                                                                      | 24                                                          | 38                                                   |
| (+) Gestational days         |                                                     | 3                                                                                   | 6                                                                         | 6                                           | 5                                                                       | 1                                                           | 0                                                    |
| Fetal sex                    |                                                     | Female                                                                              | Male                                                                      | Female                                      | Male                                                                    | Male                                                        | Female                                               |
| Pathologies during pregnancy |                                                     | IUGR, Oligohydramnios                                                               | IUGR                                                                      | None                                        | IUGR, treated pre-eclampsia                                             | IUGR                                                        | Insulin-treated gestational diabetes, polyhydramnios |
| Pathology report             | Fetal pathology (as per autopsy report)             | Massive cardiac hypertrophy                                                         | Bilateral cleft lip, subcapsular liver hematomas, fresh brain haemorrhage | Cardiac hypertrophy                         | None                                                                    | None                                                        | None                                                 |
|                              | Maceration Grade                                    | 0                                                                                   | 0                                                                         | I                                           | II                                                                      | II                                                          | III                                                  |
|                              | Fetal weight [g]                                    | 500                                                                                 | 365                                                                       | 600                                         | 500                                                                     | 2560                                                        | 3700                                                 |
|                              | Fetal growth centiles                               | 0.3                                                                                 | 0.3                                                                       | 47.8                                        | 0.4                                                                     | 2.5                                                         | 63.9                                                 |
|                              | Cord pathology                                      | None                                                                                | None                                                                      | Edematous Wharton's jelly                   | None                                                                    | 2x umbilical cord entanglement, long umbilical cord (64 cm) | True umbilical knot, long umbilical cord (≥40 cm)    |
|                              | Placental histology (Turowski et al.) <sup>53</sup> | Maternal circulatory disorder (Category 4); Delayed villous maturation (Category 6) | Maternal circulatory disorder (Category 4)                                | Normal (Category 1)                         | Maternal circulatory disorder (Category 4)                              | Implantation disorder (Category 8)                          | Normal (Category 1)                                  |
|                              | Cause of IUFD (Tulip)                               | 2.2.1. Placental bed pathology + 2.2.2. Placental development pathology             | 1.11.2. Congenital anomaly - other (multiple organs)                      | 6. Unknown - Despite thorough investigation | 2.2.1. Placental bed pathology + 2.2.2. Placental development pathology | 2.3. Umbilical cord complication                            | 2.3. Umbilical cord complication                     |
| Coagulation parameters       | Blood loss [ml]                                     | 500                                                                                 | 150                                                                       | 800                                         | 200                                                                     | 500                                                         | 100                                                  |
|                              | Platelet count [G/L]                                | 97                                                                                  | 46                                                                        | 29                                          | 108                                                                     | 67                                                          | 62                                                   |
|                              | Prothrombin time [%]                                | 104                                                                                 | 78                                                                        | 25                                          | 75                                                                      | 59                                                          | 68                                                   |
|                              | Fibrinogen [g/dl]                                   | 2.7                                                                                 | 2.66                                                                      | 1.93                                        | 2.85                                                                    | 1.93                                                        | 1.14                                                 |
|                              | Erez Score [pos ≥27]                                | 27                                                                                  | 26                                                                        | 51                                          | 26                                                                      | 52                                                          | 39                                                   |
